# Supplementary material for: Butadiene from biomass, a life cycle perspective to address sustainability in the chemical industry
Source: Royal Society of Chemistry journal article supplement (doi:10.1039/c5gc02148k), 2015-10-28
Supplement: c5gc02148k10.pdf [file c5gc02148k10.pdf]

Supporting information

| Substances                      | Amount   | Unit |
|---------------------------------|----------|------|
| <i>Inputs</i>                   |          |      |
| Naphtha                         | 2.22E+01 | t    |
| Energy                          | 2.00E+02 | GJ   |
| <i>Co-products</i>              |          |      |
| Ethylene                        | 7.00E+00 | t    |
| Propylene                       | 3.22E+00 | t    |
| Aromatics and C4                | 2.89E+00 | t    |
| CH <sub>4</sub>                 | 3.00E+00 | t    |
| H <sub>2</sub>                  | 2.22E-01 | t    |
| Other                           | 2.44E+00 | t    |
| <i>Outputs</i>                  |          |      |
| Losses&blackflows               | 2.44E+00 | t    |
| CO <sub>2</sub>                 | 1.33E+01 | t    |
| <i>Allocation to be applied</i> | 4.5      | %    |

Tab. S1 Naphtha cracking LCI to 1t of BD.

| Substances                      | Amount   | Unit |
|---------------------------------|----------|------|
| <i>Inputs</i>                   |          |      |
| Ethanol <sup>i</sup>            | 2.06E+00 | t    |
| Electricity                     | 9.86E-01 | GJ   |
| Cooling water                   | 7.00E+01 | t    |
| Steam                           | 2.66E+00 | t    |
| <i>Co-products</i>              |          |      |
| Fuel (Methane)                  | 1.40E-01 | t    |
| Diethyl Ether                   | 3.81E-02 | t    |
| Acetaldehyde                    | 2.26E-01 | t    |
| <i>Outputs</i>                  |          |      |
| CO <sub>2</sub>                 | 9.06E-03 | t    |
| <i>Allocation to be applied</i> | 48.0     | %    |

Tab. S2 Lebedev process LCI to 1t of BD.

| <b>Substances</b>               | <b>Amount</b> | <b>Unit</b> |
|---------------------------------|---------------|-------------|
| <i>Inputs</i>                   |               |             |
| Ethanol <sup>i</sup>            | 3.75E+00      | t           |
| Electricity                     | 7.74E-01      | GJ          |
| Cooling water                   | 5.00E+01      | t           |
| Steam                           | 2.20E+00      | t           |
| <i>Co-products</i>              |               |             |
| Ethylene                        | 8.51E-02      | t           |
| Butene                          | 9.56E-02      | t           |
| n-Butanol                       | 2.77E-02      | t           |
| Butyraldehyde                   | 3.00E-03      | t           |
| Crothyl alcohol                 | 1.92E-02      | t           |
| <i>Outputs</i>                  |               |             |
| CO <sub>2</sub>                 | 2.10E+00      | t           |
| <i>Allocation to be applied</i> | 38.0          | %           |

**Tab. S3** Ostromisslensky process LCI to 1t of BD.

<sup>i</sup>As described in the manuscript several alternatives to simulate ethanol production were considered depending on which country is chosen as supplier:

- United States - a **100% Ethanol, 95% in H<sub>2</sub>O, from corn, at distillery/US U**
- Brazil - a **100% Ethanol, 95% in H<sub>2</sub>O, from sugar cane, at fermentation plant/BR U**
- Europe – **1/6 Ethanol, 95% in H<sub>2</sub>O, from corn, at distillery/US U, 1/6 Ethanol, 95% in H<sub>2</sub>O, from rye, at distillery/RER U, 1/3 Ethanol, 95% in H<sub>2</sub>O, from sugar beets, at fermentation plant/CH U and 1/3 Ethanol from wheat, Europe (inventory reported below).**

| <b>Process input</b>                             | <b>Amount</b> | <b>Unit</b> |
|--------------------------------------------------|---------------|-------------|
| Wheat grains conventional, Barrois, at farm/FR U | 2.5           | kg          |
| Chemicals organic, at plant/GLO U                | 0.02          | kg          |
| Water, unspecified natural origin/kg             | 0.31          | kg          |
| Electricity, production mix RER/RER U            | 0.1           | kWh         |
| Heat, unspecific, in chemical plant/RER U        | 5.1           | MJ          |
| Transport, lorry >16t, fleet average/RER U       | 0.27          | tkm         |

**Tab. S4** LCI for 1 kg of ethanol from EU wheat.

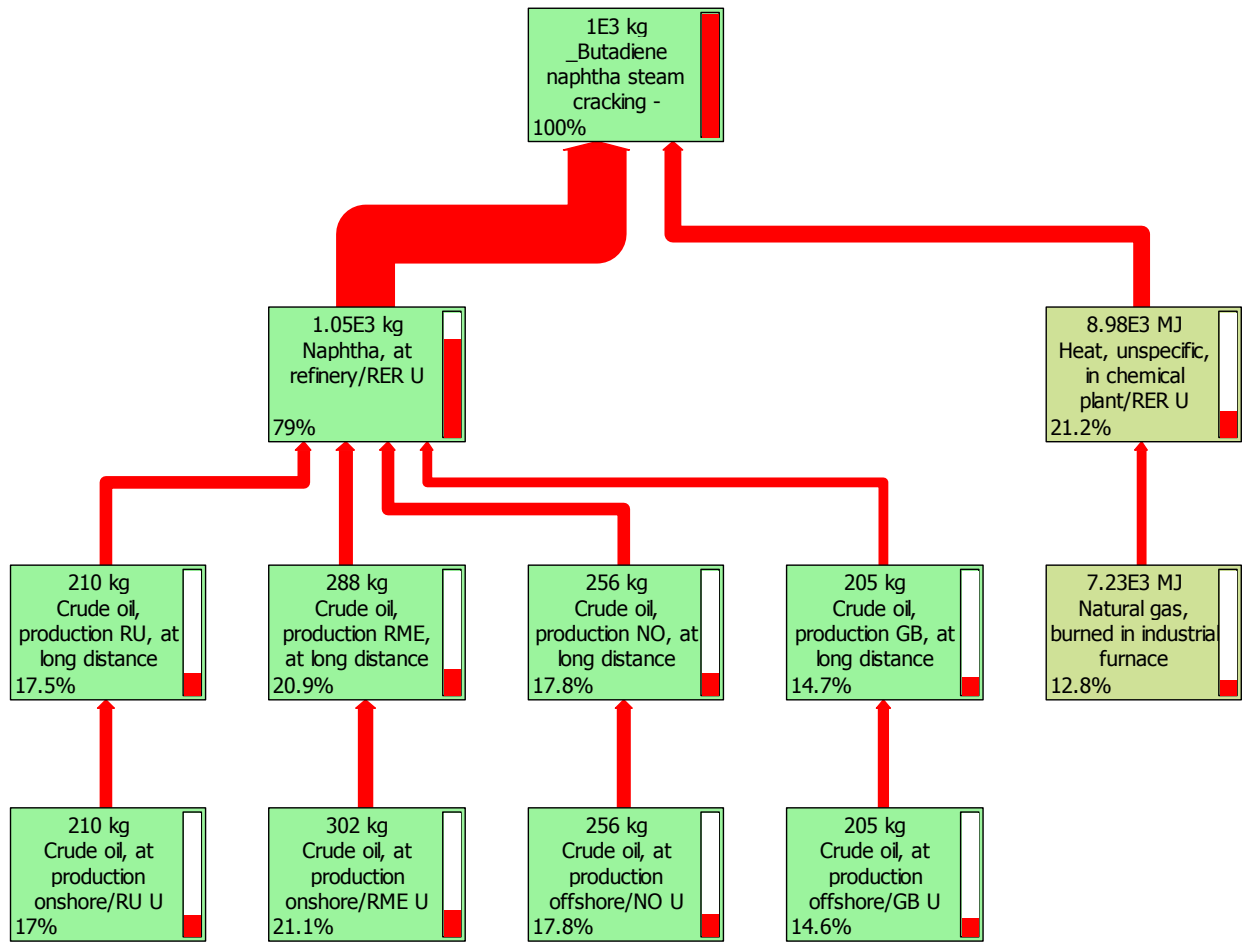

Fig. S1 Cumulative contribution to CED for naphtha cracking route to BD.

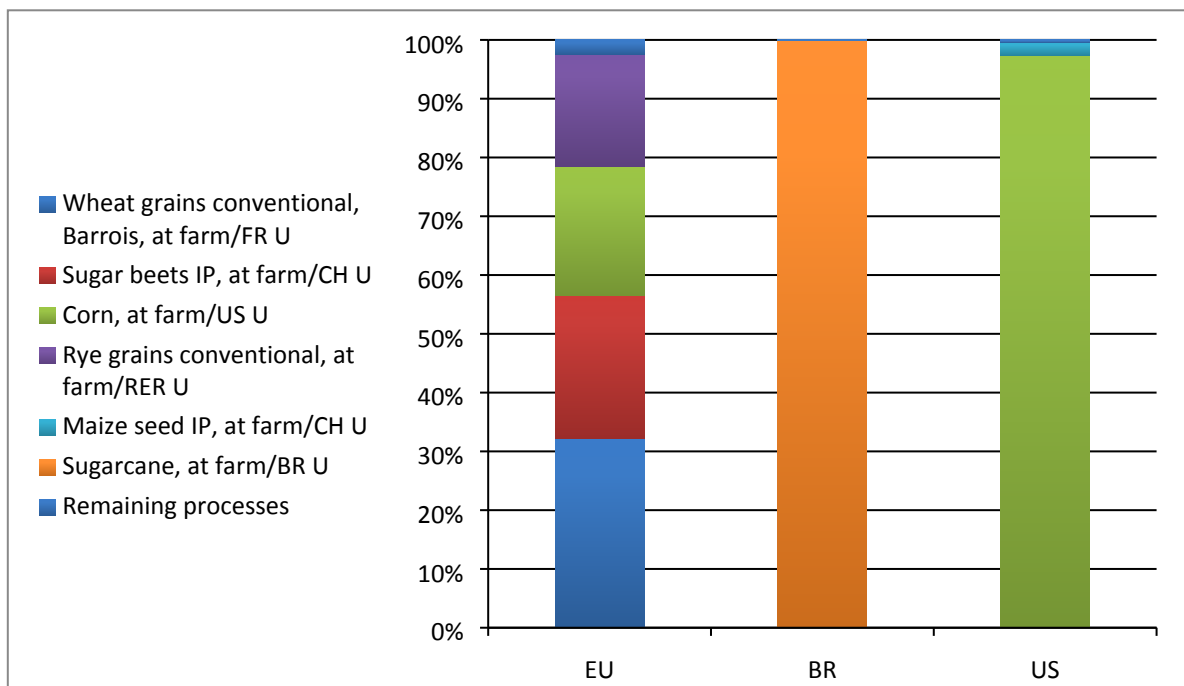

Fig. S2 CED contribution to the renewable biomass category for the unconventional BD routes.

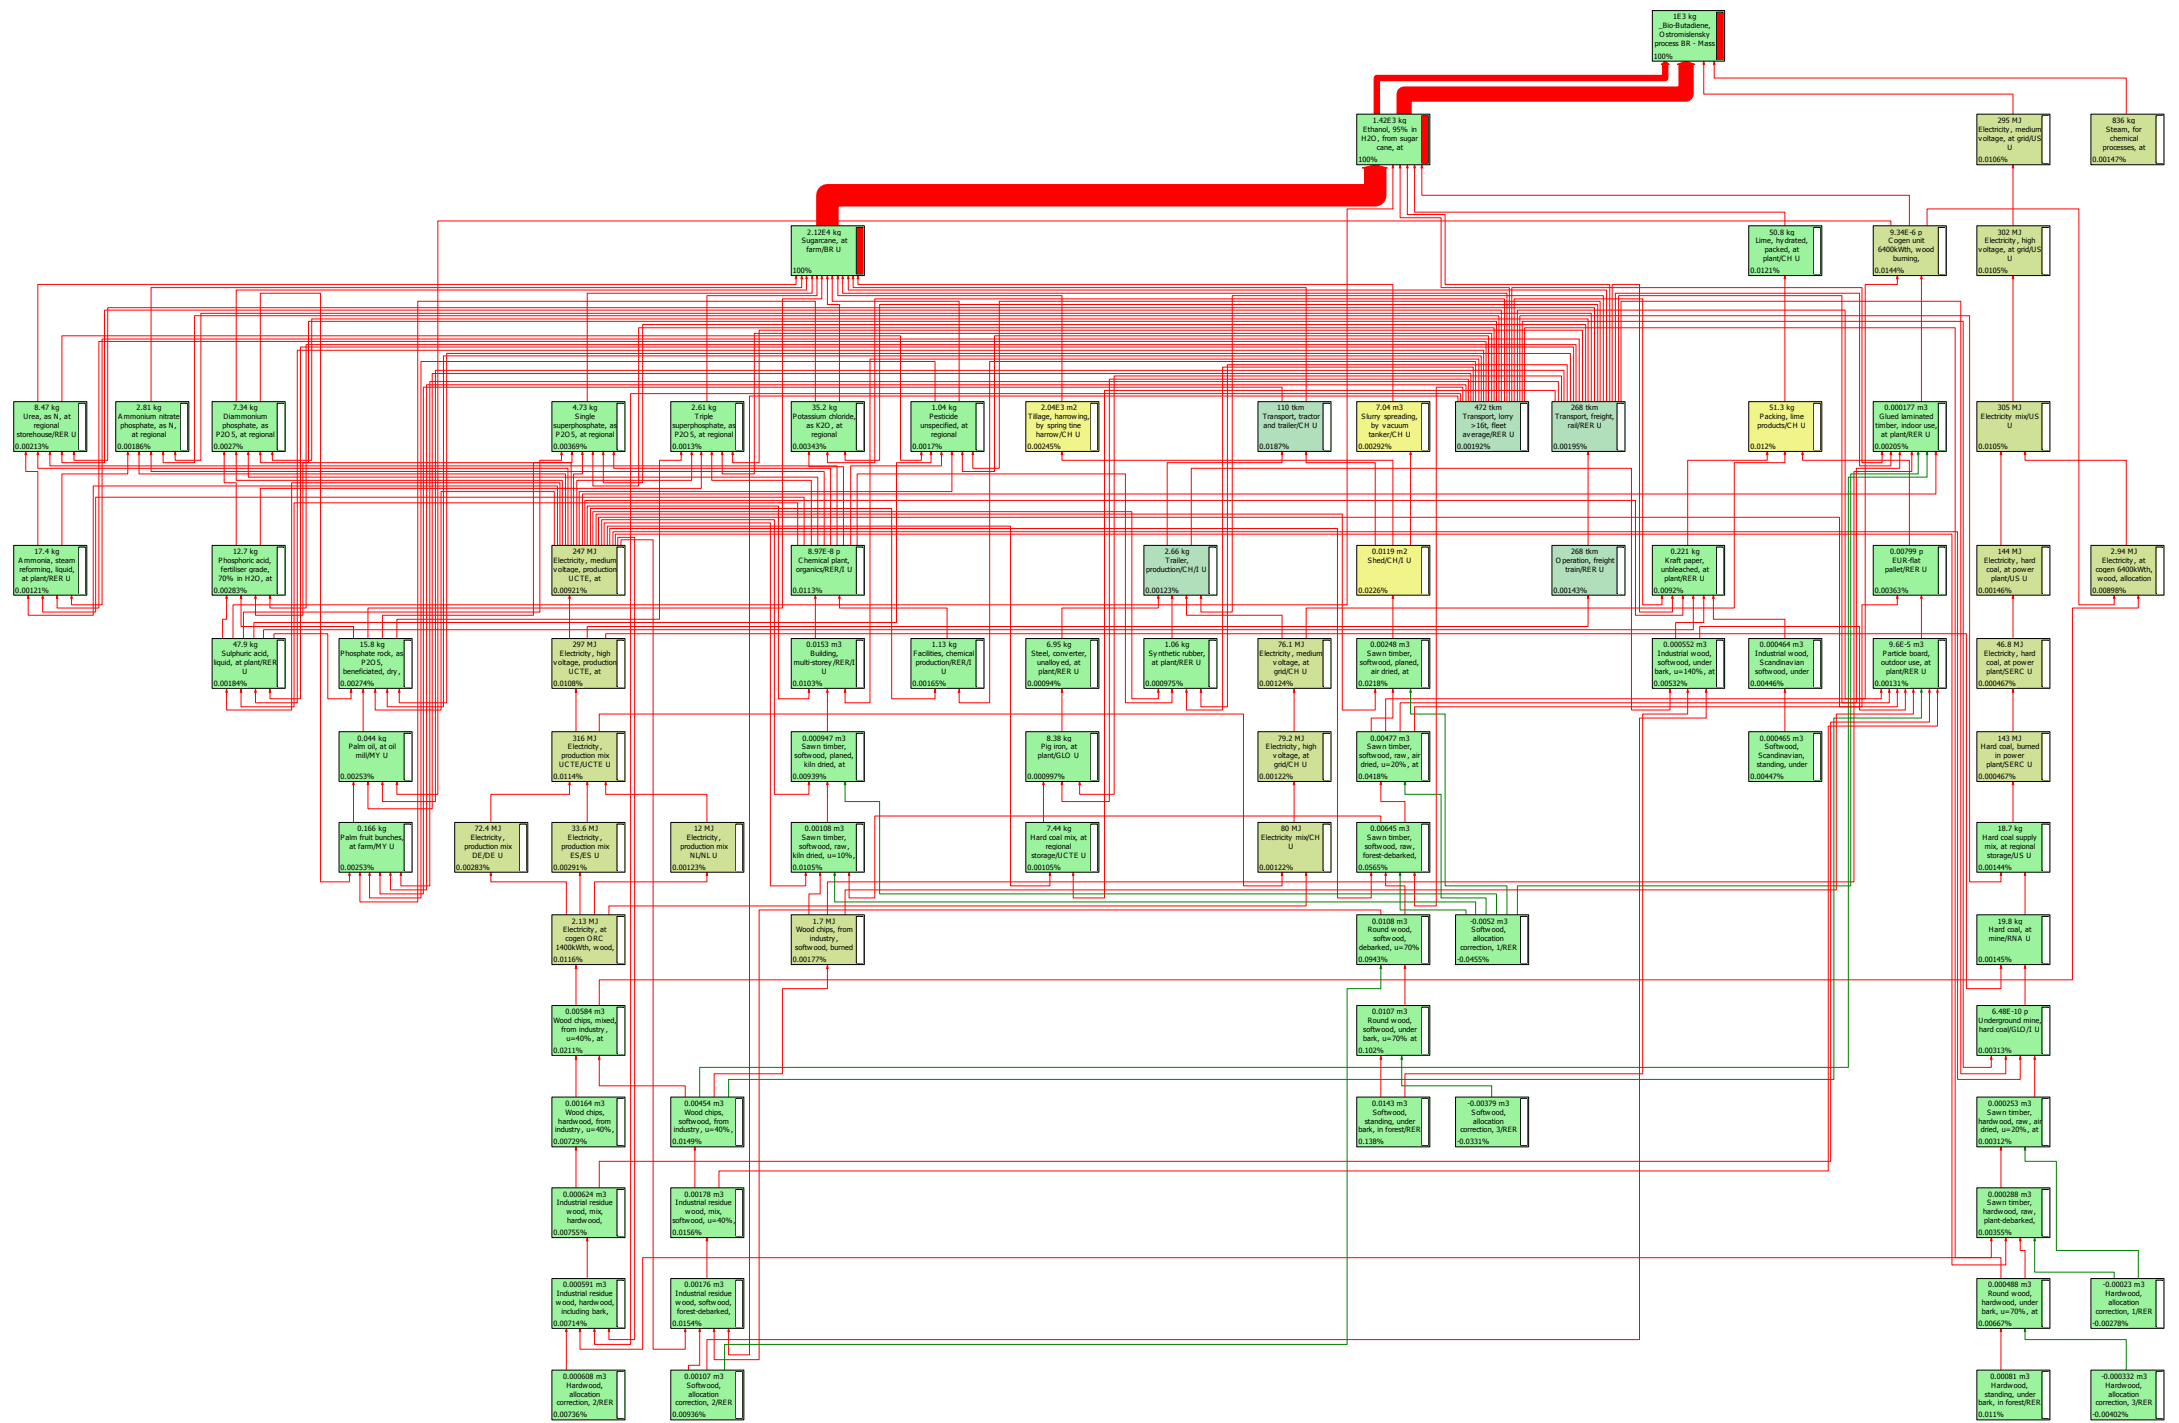

Fig. S3 CED contribution to the renewable biomass category for the unconventional BD route in Brazil, using network tool.

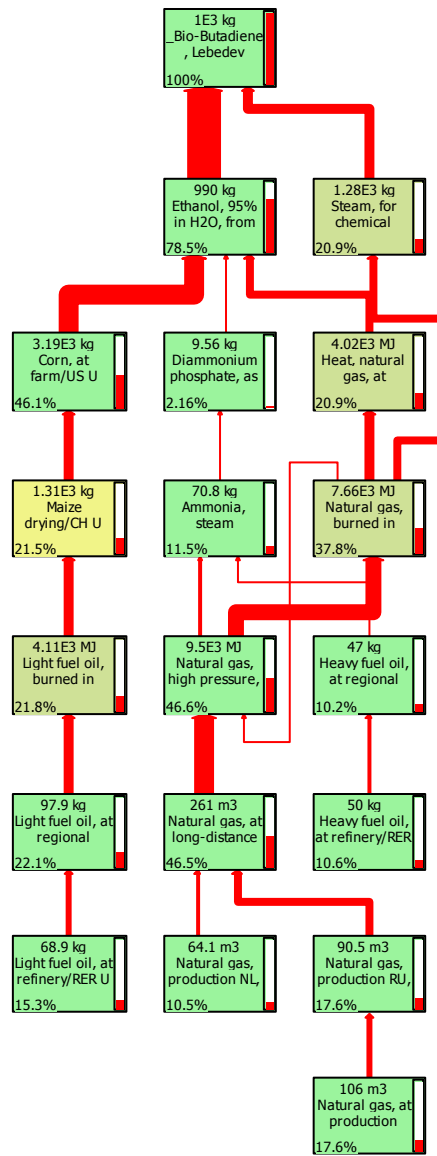

Fig. S4 CED contribution to the non-renewable fossil category, using network tool: Lebedev process in the United States.

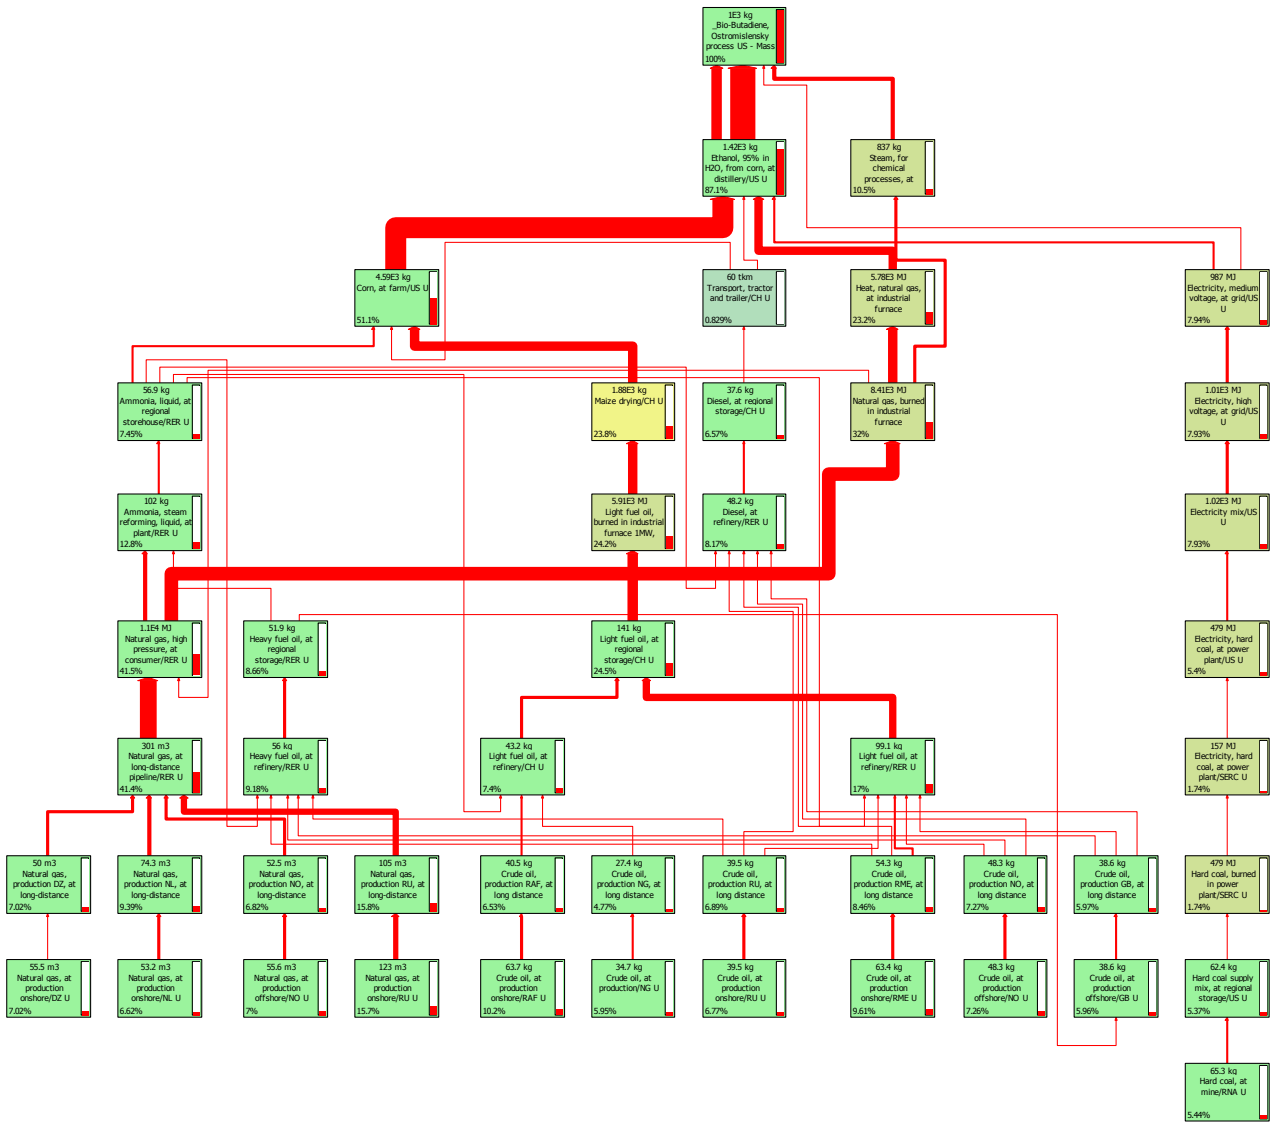

Fig. S5 CED contribution to the non-renewable fossil category, using network tool: Ostromisslensky process in the United States.

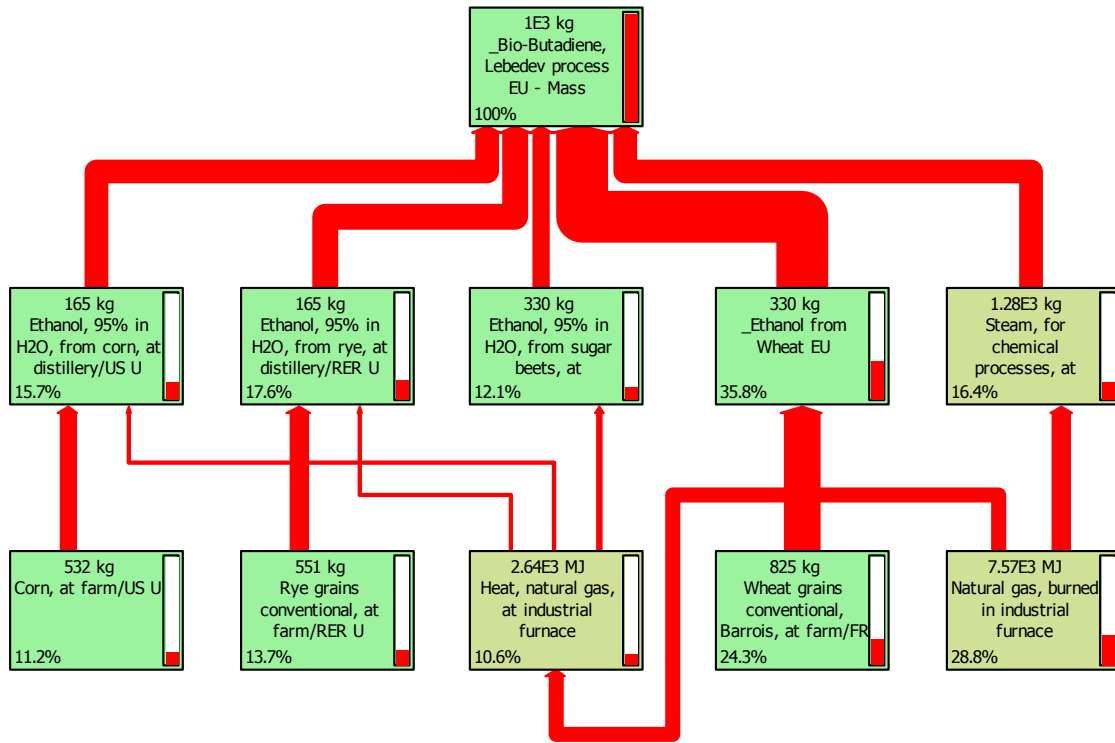

Fig. S6 GWP contribution through network tool for the Lebedev process in Europe.

| BD, naphthta cracking | Bio- BD, Lebedev (EU) | Bio- BD, Lebedev (BR) | Bio- BD, Lebedev (US) | Bio- BD, Ostromiss lensky (EU) | Bio- BD, Ostromiss lensky (BR) | Bio- BD, Ostromiss lensky (US) | Bio-BD, Lebedev (EU) at 2023 |
|-----------------------|-----------------------|-----------------------|-----------------------|--------------------------------|--------------------------------|--------------------------------|------------------------------|
| 2.13                  | 2.04                  | 1.04                  | 2.30                  | 3.62                           | 2.18                           | 4.00                           | 1.49                         |

Tab. S5 Results from the cradle-to-gate carbon footprint for each scenario in terms of t CO<sub>2</sub> eq.

| BD, naphthta cracking | Bio- BD, Lebedev (EU) | Bio- BD, Lebedev (BR) | Bio- BD, Lebedev (US) | Bio- BD, Ostromisslensky (EU) | Bio- BD, Ostromisslensky (BR) | Bio- BD, Ostromisslensky (US) |
|-----------------------|-----------------------|-----------------------|-----------------------|-------------------------------|-------------------------------|-------------------------------|
| 5.12                  | 12.63                 | 19.95                 | 28.57                 | 16.81                         | 27.34                         | 39.73                         |

Tab. S6 Results from the cradle-to-gate water consumption in m<sup>3</sup> per ton of BD.

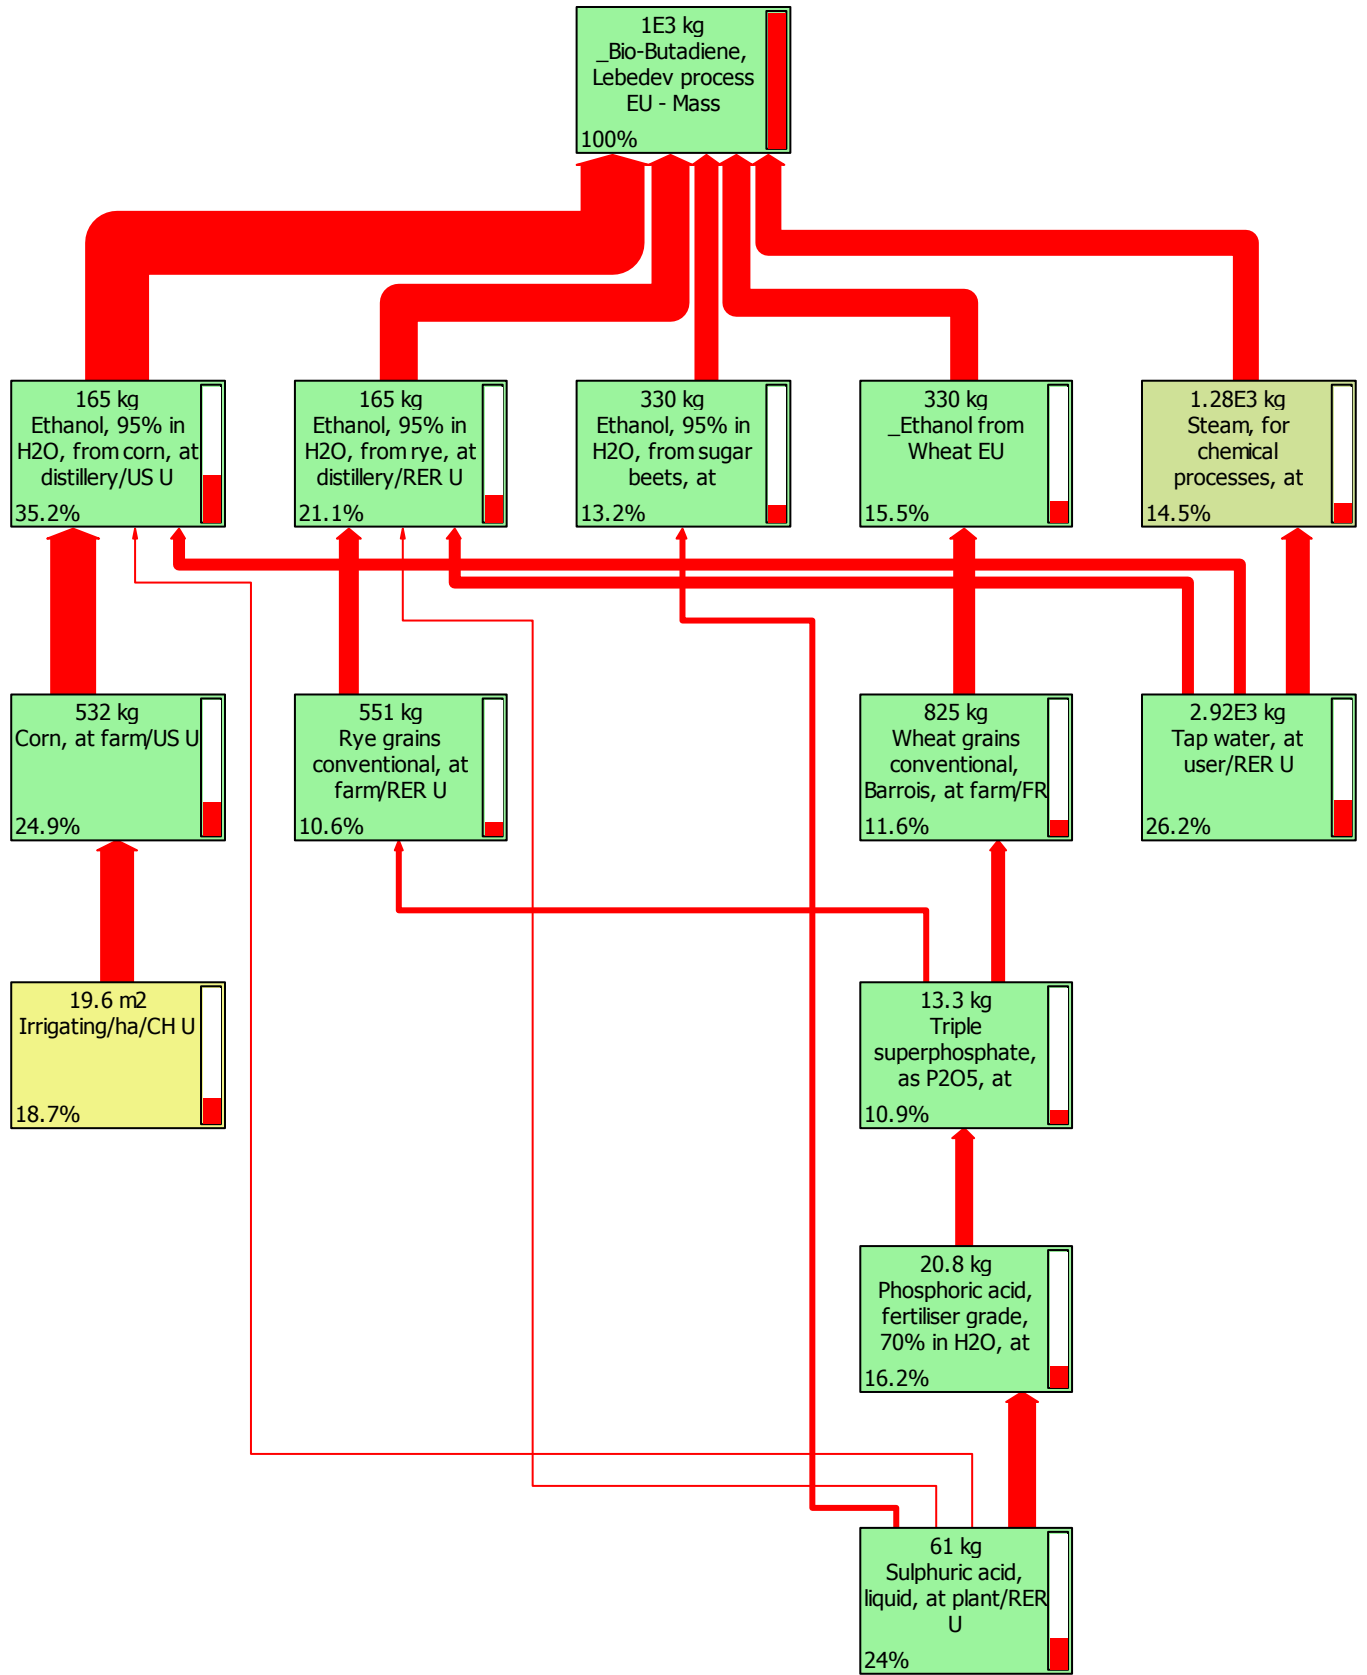

Fig. S7 Contribution to water depletion through network tool for the Lebedev process in Europe.



| Impact categories - Pt           | BD,<br>naphthta<br>cracking | Bio- BD,<br>Lebedev<br>(EU) | Bio- BD,<br>Lebedev<br>(BR) | Bio- BD,<br>Lebedev<br>(US) | Bio- BD,<br>Ostromisslensky<br>(EU) | Bio- BD,<br>Ostromisslensky<br>(BR) | Bio- BD,<br>Ostromisslensky<br>(US) | Bio-BD,<br>Ostromisslensky<br>(US)-NO 100%<br>bio |
|----------------------------------|-----------------------------|-----------------------------|-----------------------------|-----------------------------|-------------------------------------|-------------------------------------|-------------------------------------|---------------------------------------------------|
| <i>Climate change</i>            | 7.38E+01                    | 7.31E+01                    | 3.46E+01                    | 8.23E+01                    | 1.30E+02                            | 7.45E+01                            | 1.43E+02                            | 1.59E+02                                          |
| <i>Particu. matter formation</i> | 1.39E+01                    | 2.29E+01                    | 2.04E+01                    | 2.35E+01                    | 3.25E+01                            | 2.89E+01                            | 3.33E+01                            | 3.42E+01                                          |
| <i>Terrestrial ecotoxicity</i>   | 9.28E-03                    | 5.22E+00                    | 5.29E+00                    | 1.21E+00                    | 7.51E+00                            | 7.61E+00                            | 1.74E+00                            | 1.22E+00                                          |
| <i>Agricul. land occupation</i>  | 1.60E-02                    | 2.78E+01                    | 1.67E+01                    | 1.90E+01                    | 4.00E+01                            | 2.39E+01                            | 2.73E+01                            | 1.92E+01                                          |
| <i>Fossil fuel depletion</i>     | 1.56E+02                    | 4.60E+01                    | 1.92E+01                    | 5.58E+01                    | 5.84E+01                            | 1.98E+01                            | 7.25E+01                            | 1.22E+02                                          |
| <i>Tot</i>                       | 2.43E+02                    | 1.77E+02                    | 9.76E+01                    | 1.84E+02                    | 2.68E+02                            | 1.55E+02                            | 2.78E+02                            | 3.36E+02                                          |

**Tab. S7** Results from the ReCiPe aggregation procedure into single-score eco-indicator.



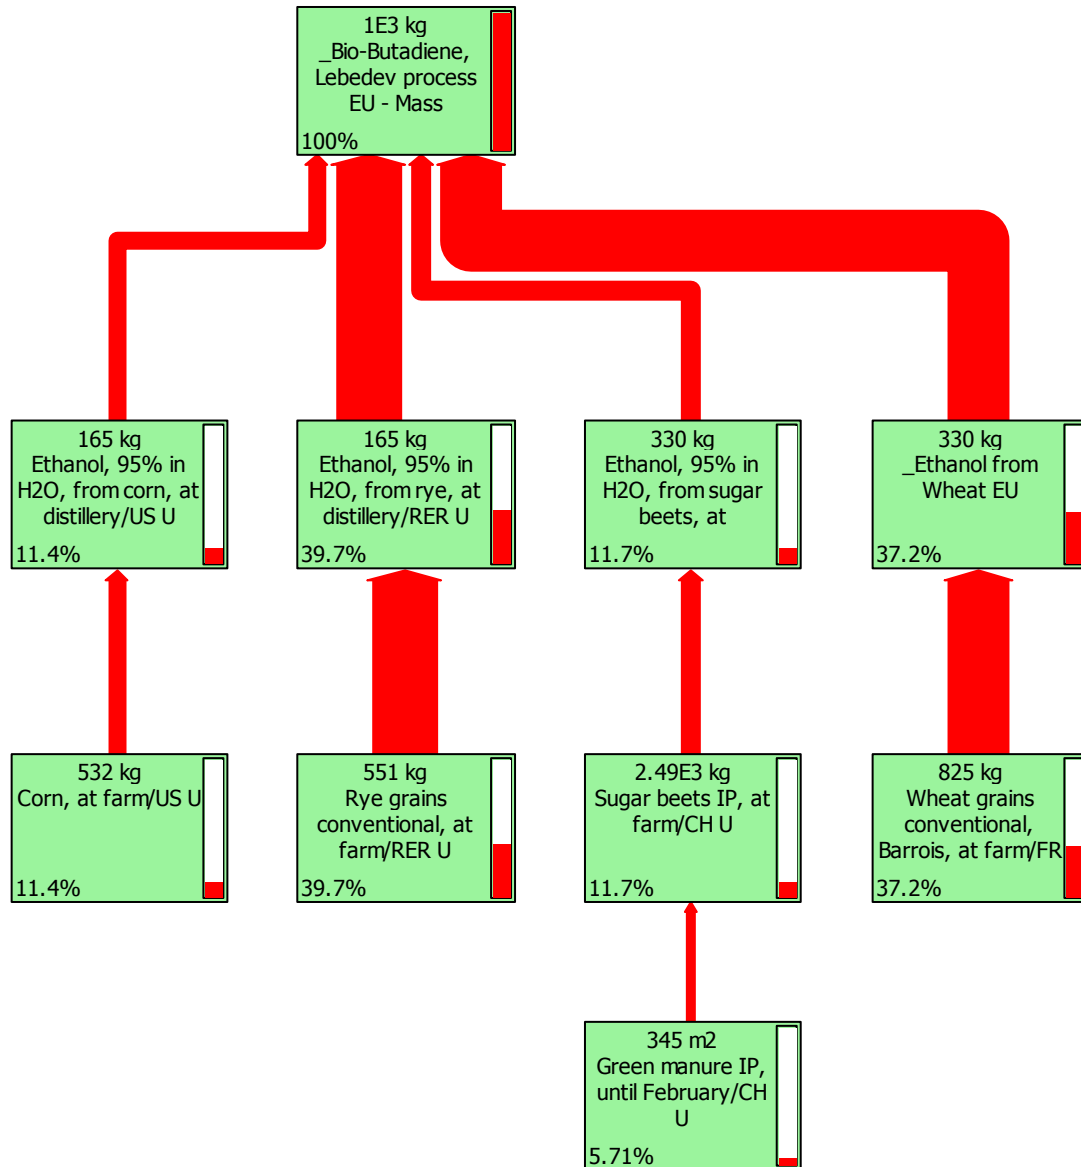

**Fig. S9** Contribution to the agricultural land occupation through network tool for the Lebedev process in Europe.

| Contribution to PMF | BD, naphthta cracking | Bio- BD, Lebedev (EU) | Bio- BD, Lebedev (BR) | Bio- BD, Lebedev (US) | Bio- BD, Ostromisslensky (EU) | Bio- BD, Ostromisslensky (BR) | Bio- BD, Ostromisslensky (US) |
|---------------------|-----------------------|-----------------------|-----------------------|-----------------------|-------------------------------|-------------------------------|-------------------------------|
| Process Energy      | 30%                   | 6%                    | 7%                    | 6%                    | 5%                            | 5%                            | 5%                            |
| Naphtha production  | 70%                   | 0%                    | 0%                    | 0%                    | 0%                            | 0%                            | 0%                            |
| Ethanol production  | 0%                    | 94%                   | 93%                   | 94%                   | 95%                           | 95%                           | 95%                           |

**Tab. S8** Contribution to PMF impact category.
