# Supplementary figures and images for: Butadiene from biomass, a life cycle perspective to address sustainability in the chemical industry
Source: Royal Society of Chemistry journal article supplement (doi:10.1039/c5gc02148k), 2015-10-28

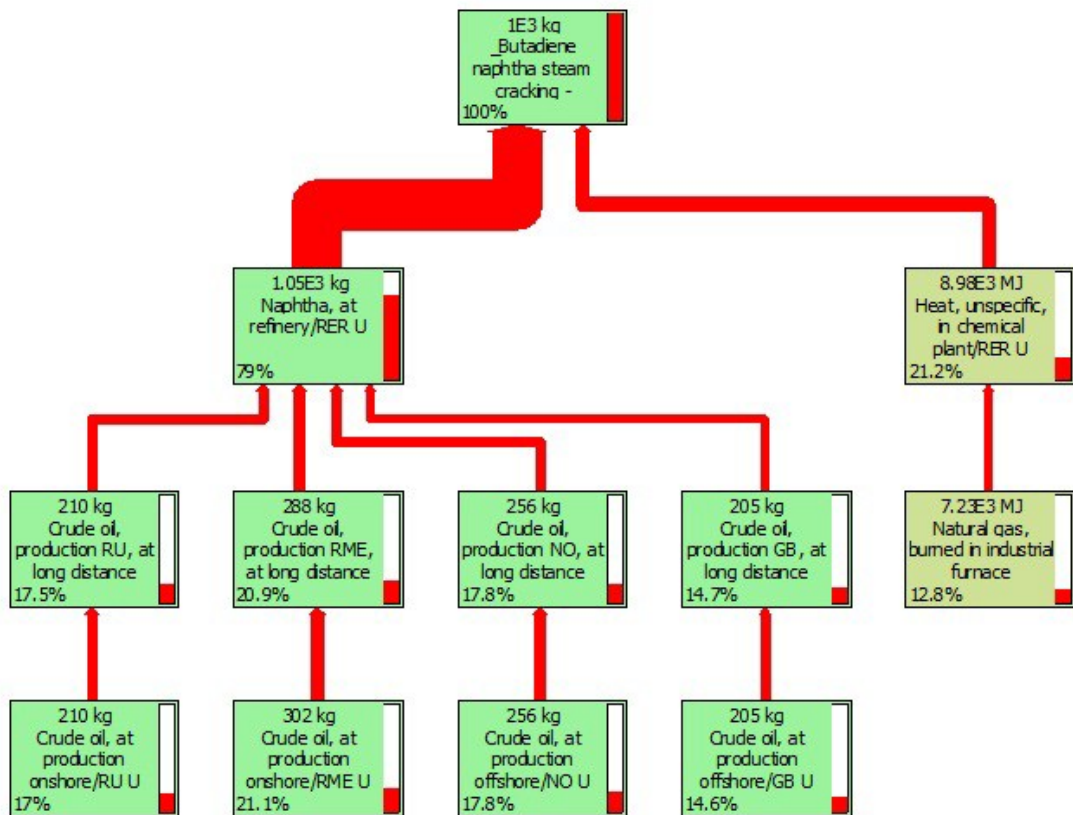

Supplement: c5gc02148k1.pdf [file c5gc02148k1.pdf]

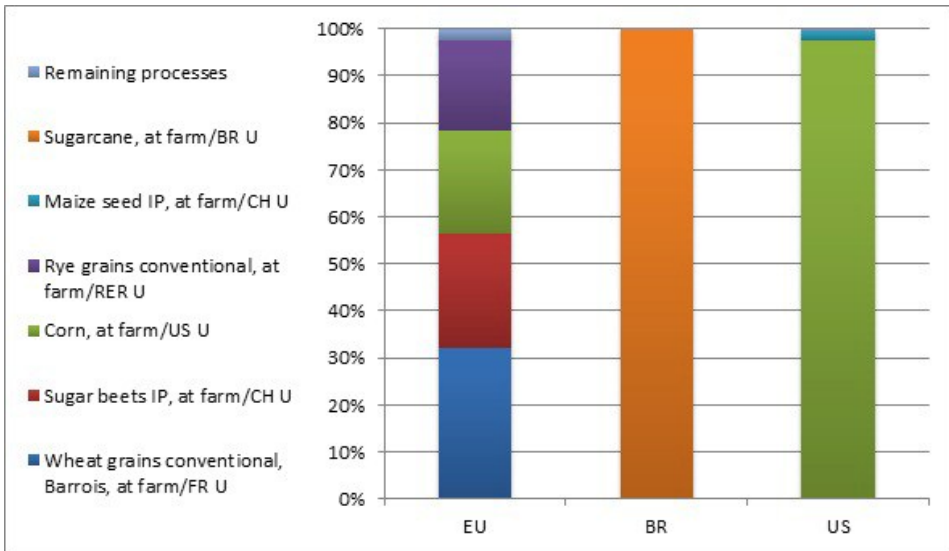

Supplement: c5gc02148k2.pdf [file c5gc02148k2.pdf]

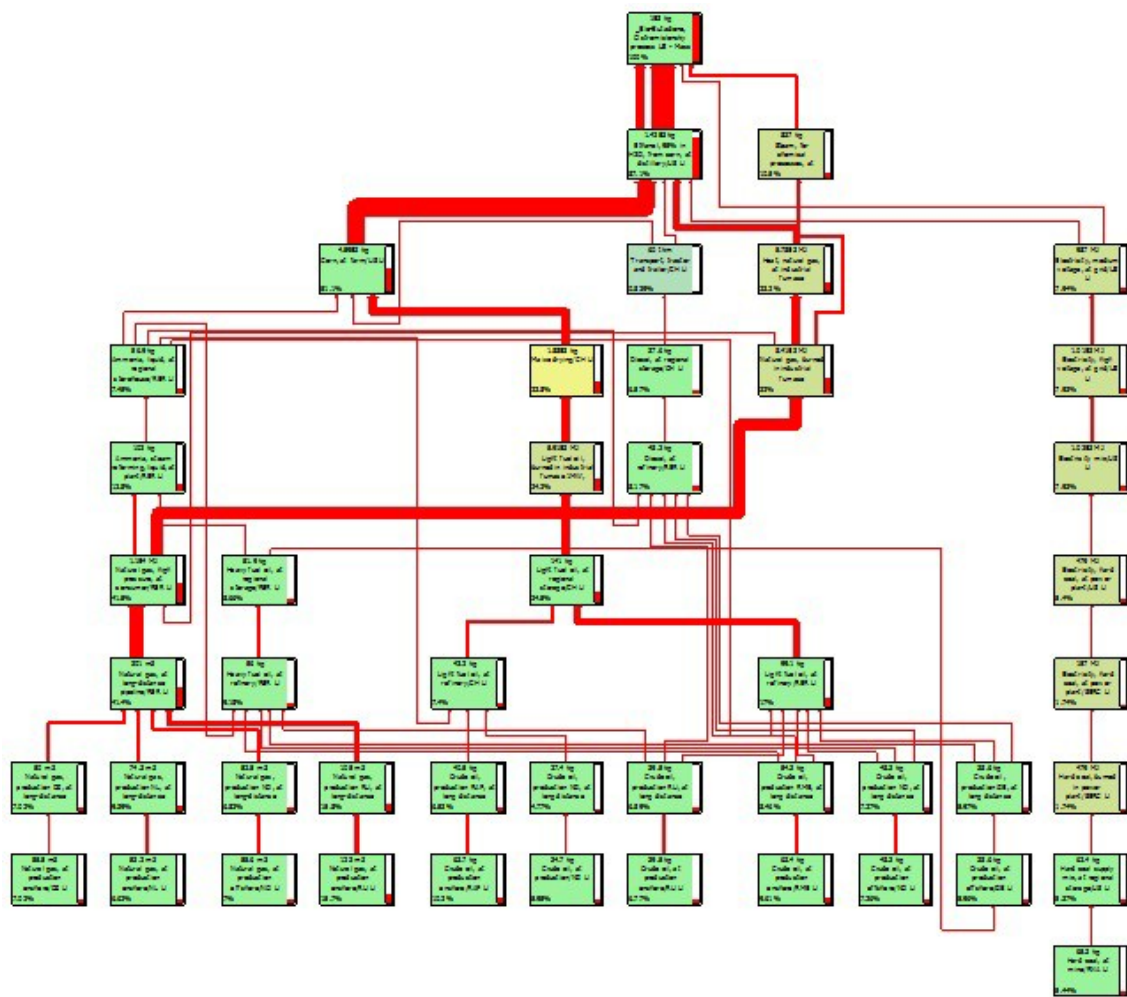

Supplement: c5gc02148k5.pdf [file c5gc02148k5.pdf]

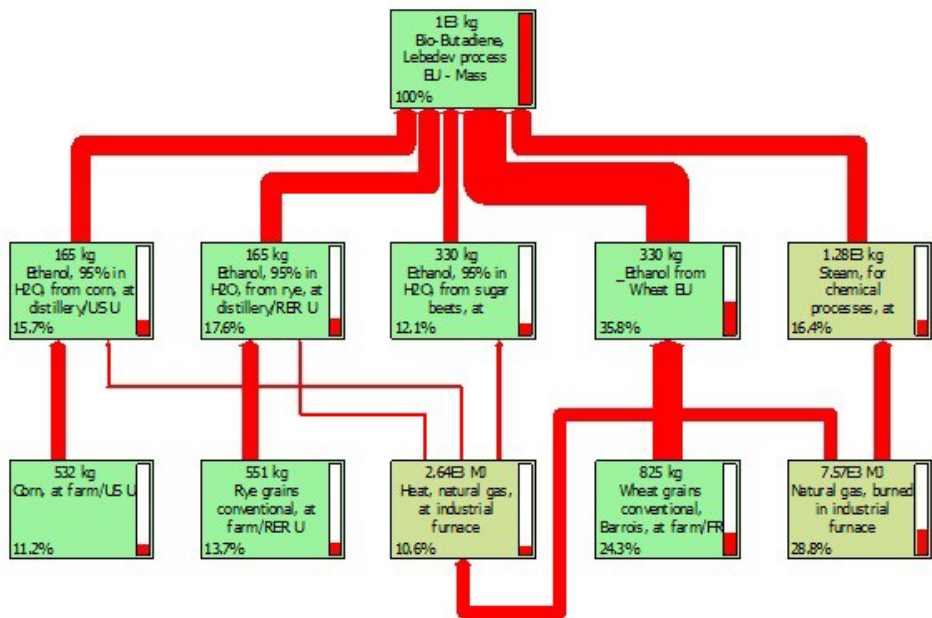

Supplement: c5gc02148k6.pdf [file c5gc02148k6.pdf]

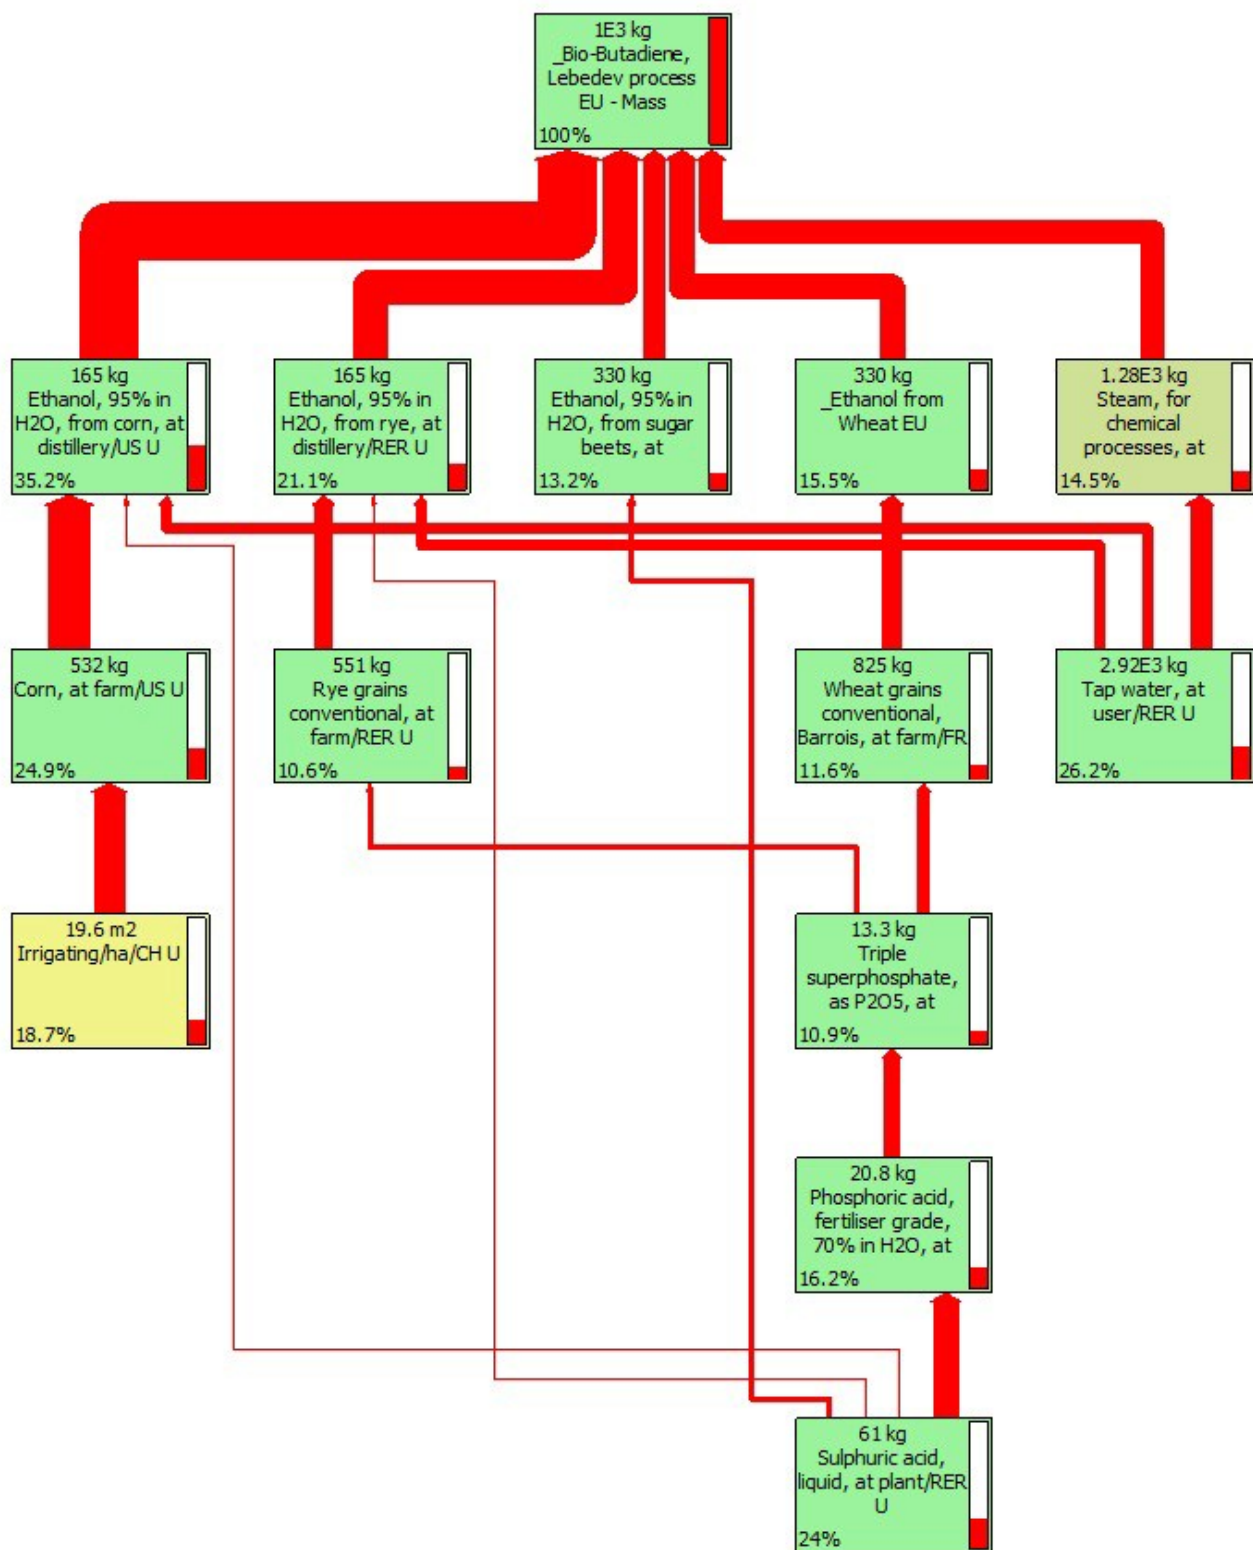

Supplement: c5gc02148k7.pdf [file c5gc02148k7.pdf]

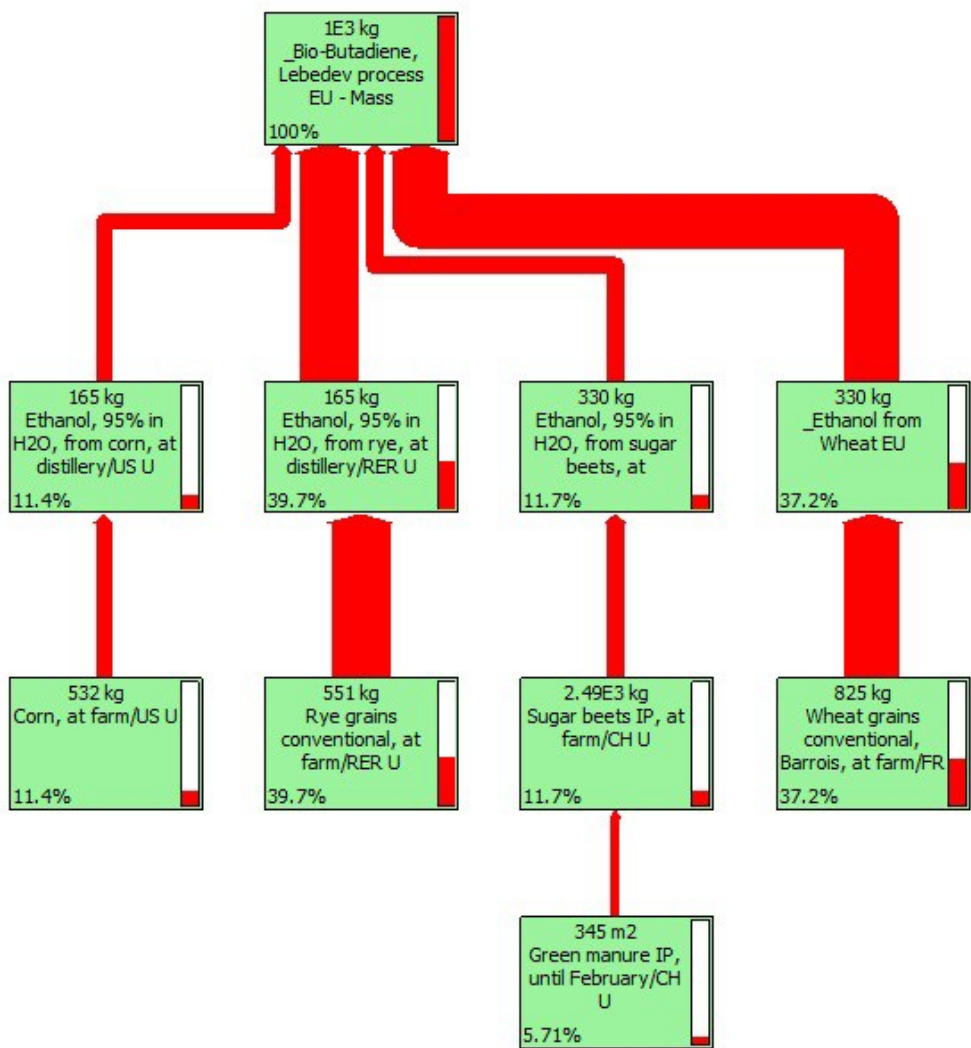

Supplement: c5gc02148k9.pdf [file c5gc02148k9.pdf]
